# Supplementary material
Source: publisher site journal article supplement (https://www.dovepress.com/article/561192)
Supplement: Supplementary file 1 [file Supplementary%20File%201.docx]

**The search strategy uses pubmed as an example:**

PubMed

#1 (((((((((Herpes Zoster[MeSH Terms]) OR (Herpes Zoster[Title/Abstract])) OR (Shingles[Title/Abstract])) OR (Zona[Title/Abstract])) OR (Zoster[Title/Abstract])) OR (Herpes Zoster Neuralgia[Title/Abstract])) OR (HZ Neuralgia[Title/Abstract])) OR (Herpetic Neuralgia[Title/Abstract])) OR (Postherpetic Neuralgia[Title/Abstract])) OR (Post-herpetic Neuralgia[Title/Abstract])

#2 (((((((((((medicine, chinese traditional[MeSH Terms]) OR (chinese medicine[Title/Abstract])) OR (traditional chinese medicine[Title/Abstract])) OR (herbal medicine[Title/Abstract])) OR (chinese traditional[Title/Abstract])) OR (chinese herbal[Title/Abstract])) OR (oriental traditional[Title/Abstract])) OR (herb[Title/Abstract])) OR (herbs[Title/Abstract])) OR (Herbal[Title/Abstract])) OR (herbals[Title/Abstract])) OR (TCM[Title/Abstract])

#3(((((((((((Acupuncture[MeSH Terms]) OR (acupuncture therapy[MeSH Terms])) OR (Acupuncture Treatment[Title/Abstract])) OR (Acupuncture Treatments[Title/Abstract])) OR (Treatment, Acupuncture[Title/Abstract])) OR (Therapy, Acupuncture[Title/Abstract])) OR (Pharmacoacupuncture Treatment[Title/Abstract])) OR (Treatment, Pharmacoacupuncture[Title/Abstract])) OR (Pharmacoacupuncture Therapy[Title/Abstract])) OR (Therapy, Pharmacoacupuncture[Title/Abstract])) OR (Acupotomy[Title/Abstract])) OR (Acupotomies[Title/Abstract])

#4 (((((((((Massage[MeSH Terms]) OR (Zone Therapy[Title/Abstract])) OR (Therapies, Zone[Title/Abstract])) OR (Zone Therapies[Title/Abstract])) OR (Therapy, Zone[Title/Abstract])) OR (Massage Therapy[Title/Abstract])) OR (Massage Therapies[Title/Abstract])) OR (Therapies, Massage[Title/Abstract])) OR (Therapy, Massage[Title/Abstract])) OR (Massage[Title/Abstract])

#5 (((((((((moxibustion[MeSH Terms]) OR (moxibustion[Title/Abstract])) OR (Moxabustion[Title/Abstract])) OR (Cupping Therapy[MeSH Terms])) OR (Cupping Therapy[Title/Abstract])) OR (Cupping Therapies[Title/Abstract])) OR (Therapy, Cupping[Title/Abstract])) OR (Cupping Treatment[Title/Abstract])) OR (Cupping Treatments[Title/Abstract])) OR (Treatment, Cupping[Title/Abstract])

#6 #2 or #3 or #4 or #5

#7 (((((random[Title/Abstract]) OR (blind[Title/Abstract])) OR (control[Title/Abstract])) OR (observational study[Title/Abstract])) OR (clinical trial[Title/Abstract])) OR (observational studies[Title/Abstract])

#8 #1 and #6 and #7
